# Supplementary material for: Cu3P@CoO core–shell heterostructure with synergistic effect for highly efficient hydrogen evolution
Source: Royal Society of Chemistry journal article supplement (doi:10.1039/d1nr06125a), 2021-01-01
Supplement: d1nr06125a1.pdf [file d1nr06125a1.pdf]

## Supplementary Information

### **Cu<sub>3</sub>P@CoO Core-shell Heterostructure with Synergistic Effect for Highly Efficient Hydrogen Evolution**

Chuan Gang<sup>†</sup>, Jiayi Chen<sup>†</sup>, Xu Li<sup>†</sup>, Bo Ma<sup>†,\*</sup>, Xudong Zhao<sup>†,\*</sup>, Yantao Chen<sup>†,‡,\*</sup>

<sup>†</sup>*Tianjin Key Lab for Photoelectric Materials and Devices, School of Materials Science and Engineering, Tianjin University of Technology, Tianjin 300384, China*

<sup>‡</sup>*Key Laboratory of Advanced Energy Materials Chemistry (Ministry of Education), College of Chemistry, Nankai University, Tianjin 300071, China*

\*Corresponding author:

harrymb@email.tjut.edu.cn (Bo Ma)

zxdwan@126.com (Xudong Zhao)

chenyantao@tjut.edu.cn (Yantao Chen)

## Details of DFT calculations

The DFT calculations are carried out by the Vienna ab-initio simulation package software (VASP)<sup>1-3</sup>. The projector augmented wave method (PAW)<sup>4</sup> with Perdew, Burke, and Ernzerhof functional (PBE)<sup>5</sup> is used. The energy cutoff is set at 500 eV. (5×5×5), (3×3×3), (3×3×1), (3×3×1), (1×1×1) k-point mesh are used for bulk CoO, bulk Cu<sub>3</sub>P, CoO (111) surface, Cu<sub>3</sub>P (300) surface, and Cu<sub>3</sub>P@CoO, respectively. The convergence tolerance is set at 10<sup>-4</sup> eV. For the systems containing Co, spin-polarization is considered. The bulk and surface models of CoO are both regarded as antiferromagnetism.

## Model structures

The CoO (111) and Cu<sub>3</sub>P (300) slabs with vacuum width of 15 Å are built from bulk CoO (space group Fm-3m) and bulk Cu<sub>3</sub>P (space group P6<sub>3</sub>cm) with (3×3) and (1×1) surface periodicity, respectively. Cu<sub>3</sub>P@CoO is built with (5×3) CoO (111) surface and (2×2) Cu<sub>3</sub>P (300) surface. The lattice mis-match is less than 5.5%.

## HER mechanism

The HER steps in alkaline solutions could be written as:

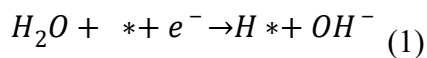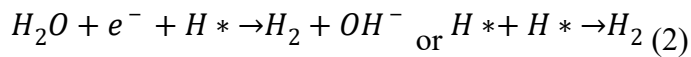

The Gibbs free energies are calculated as follows:

$$G = E_{DFT} + E_{ZPE} - TS \quad (3)$$

where  $E_{DFT}$  is the energy obtained by DFT calculations,  $E_{ZPE}$  is the zero-point energy (ZPE) correction, T is 298.15 K, and S is the entropy. The free energy of liquid H<sub>2</sub>O at 298.15 K equals to that of gas H<sub>2</sub>O at 0.035 bar.

Vibrational frequency of H<sup>+</sup> and OH<sup>-</sup> obtained by DFT is used to evaluate the ZPE and entropy change, and the latter one could be calculated as follows:

$$S(T) = \sum_{i=1}^{3N} \left[ -R \ln \left( 1 - e^{-\frac{h\nu_i}{k_B T}} \right) + \frac{N_A h \nu_i}{T} \frac{e^{-\frac{h\nu_i}{k_B T}}}{1 - e^{-\frac{h\nu_i}{k_B T}}} \right] \quad (4)$$

Four states in the HER process are mainly considered, *i.e.*, initial state, activated H<sub>2</sub>O state, adsorbed H state, and final state. The Gibbs free energy of each state is calculated as follows:

$$G_0 = G_* + G_{H_2O} \quad (5)$$

$$G_1 = G_{H_2O^*} \quad (6)$$

$$G_2 = G_{H^*} + G_{OH^-} \quad (7)$$

$$G_3 = G_* + G_{OH^-} + \frac{1}{2}G_{H_2} \quad (8)$$

The change of Gibbs free energy for each intermediate is as follows:

$$\Delta G_{H_2O^*} = G_1 - G_0 \quad (9)$$

$$\Delta G_{H^*} = G_2 - G_3 \quad (10)$$

DFT simulated energies, ZPE and entropy corrections, and free energies of H<sub>2</sub> (g), H<sub>2</sub>O (l), H\*, and H<sub>2</sub>O\*, as well as the Gibbs free energy in each step of HER are provided in Table S1 and S2, respectively.

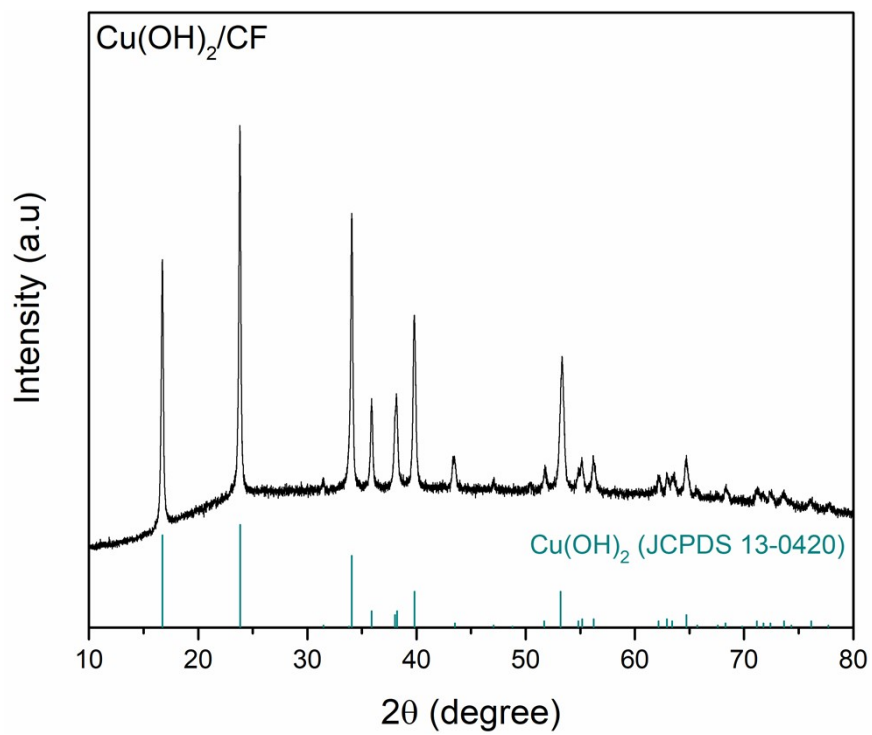

Fig. S1. XRD pattern of  $\text{Cu(OH)}_2/\text{CF}$ .

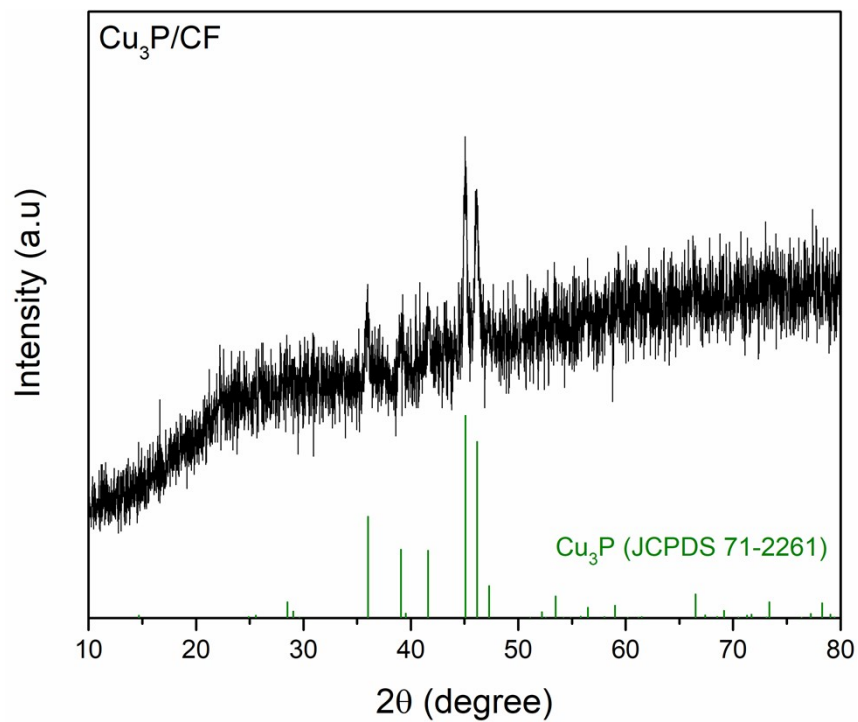

Fig. S2. XRD pattern of  $\text{Cu}_3\text{P}/\text{CF}$ .

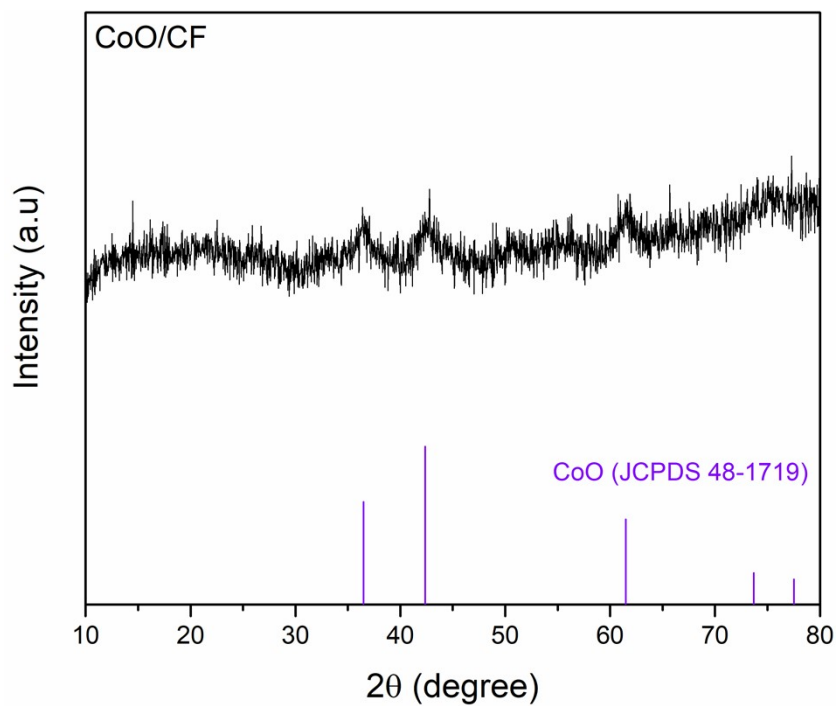

Fig. S3. XRD pattern of  $\text{CoO}/\text{CF}$ .

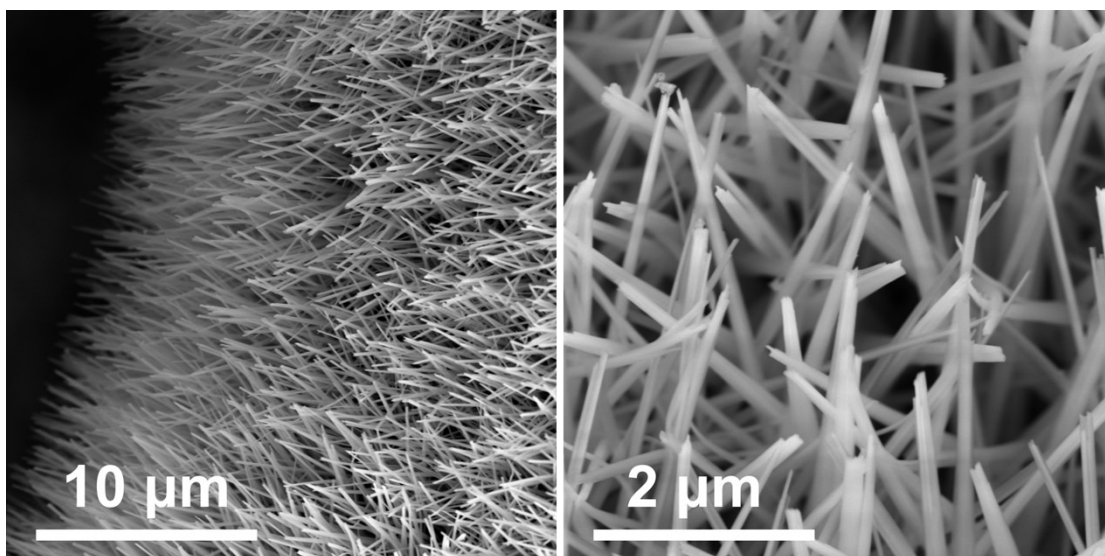

Fig. S4. SEM images of  $\text{Cu}(\text{OH})_2/\text{CF}$ .

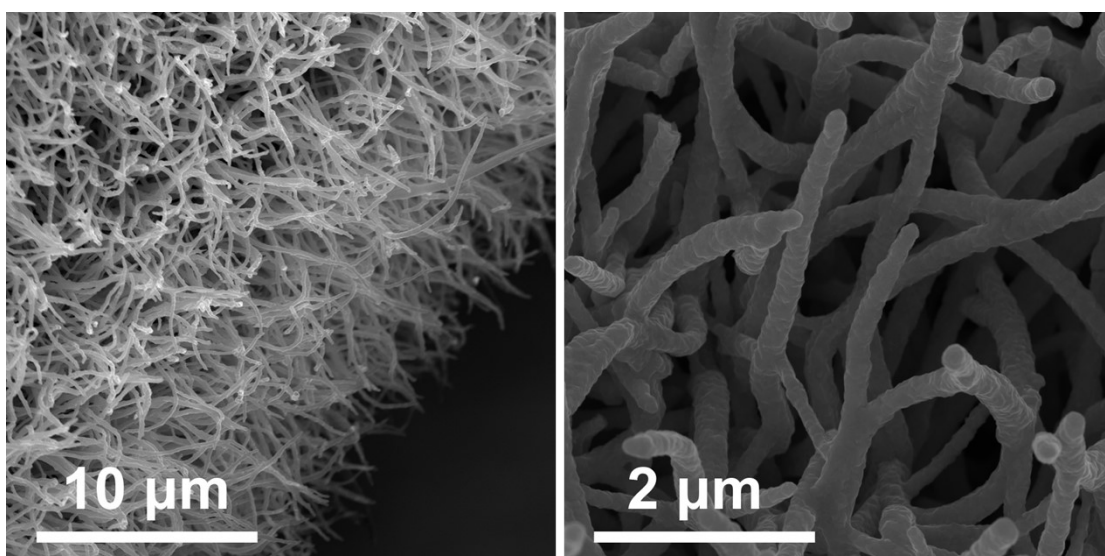

Fig. S5. SEM images of  $\text{Cu}_3\text{P}/\text{CF}$ .

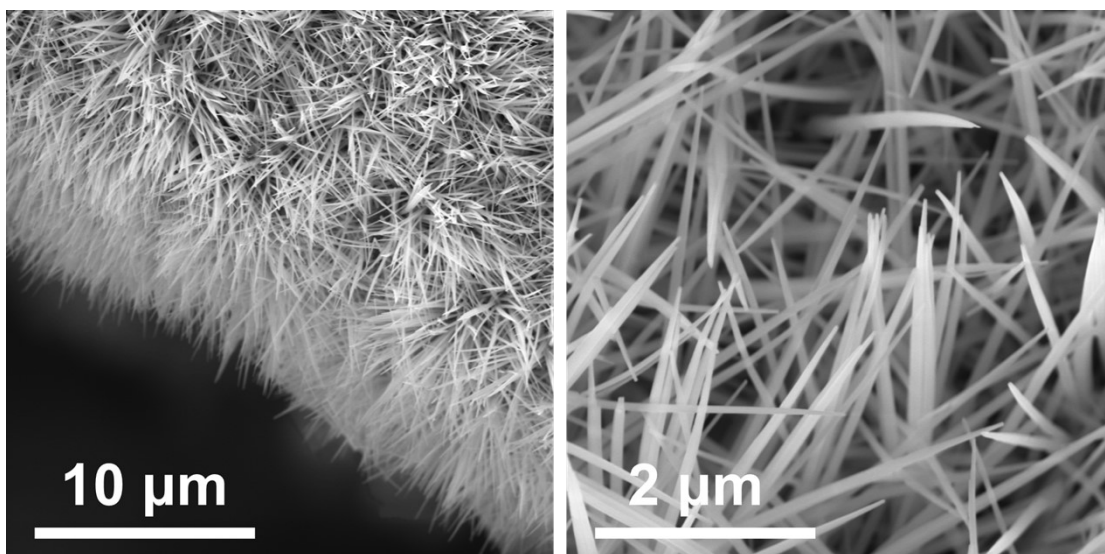

Fig. S6. SEM images of CoO/CF.

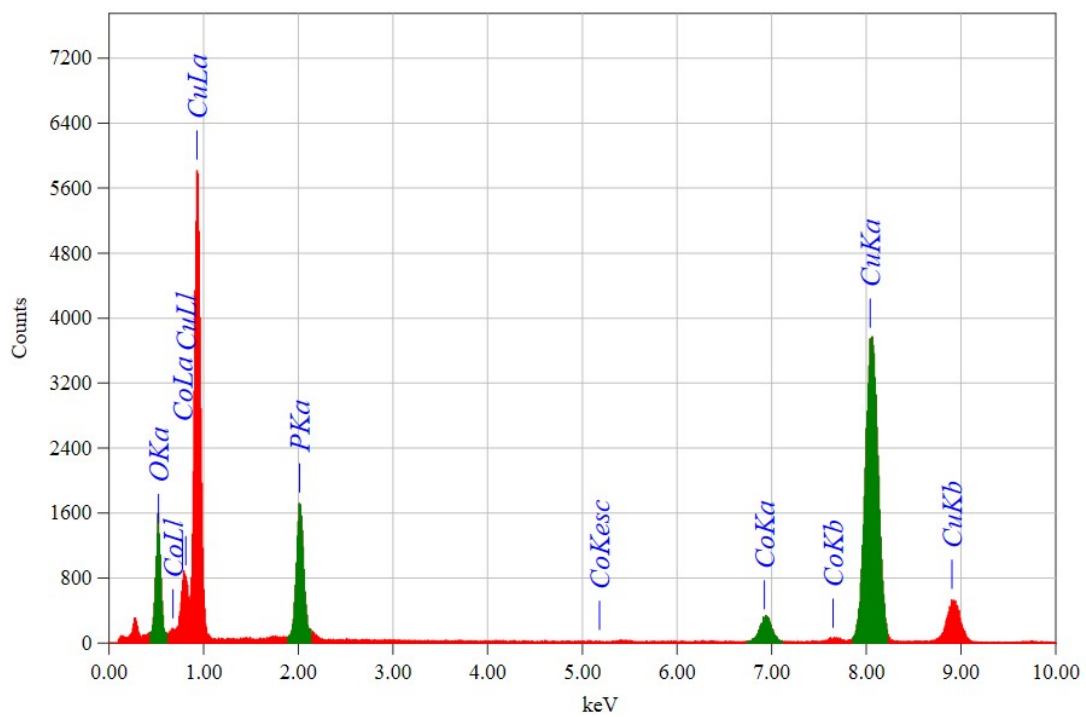

Fig. S7. EDX spectroscopy of Cu<sub>3</sub>P@CoO-4.

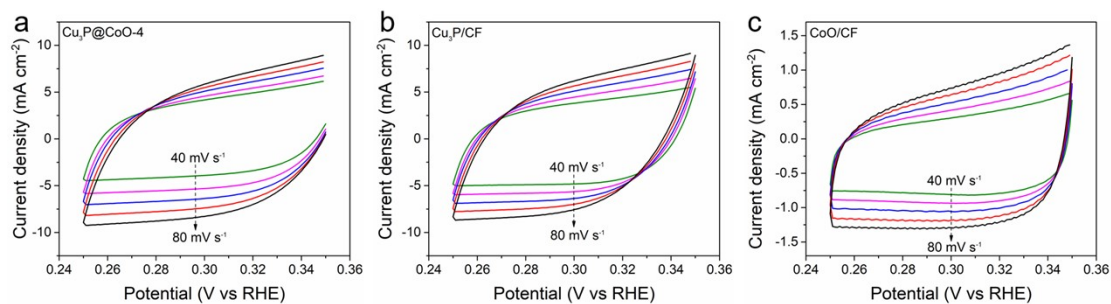

Fig. S8. CV curves for estimation of  $C_{dl}$ .

Table S1. DFT simulated energies, ZPE and entropy corrections, and free energies of  $H_2$  (g),  $H_2O$  (l),  $H^*$ , and  $H_2O^*$ .

|                                 | $E_{DFT}$ (eV) | ZPE-TS (eV) | G (eV)   |
|---------------------------------|----------------|-------------|----------|
| $H_2O$ (l)                      | -14.232        | -0.101      | -14.334  |
| $H_2$ (g)                       | -6.773         | -0.135      | -6.908   |
| <b>CoO (111)</b>                |                |             |          |
| $H^*$                           | -278.087       | 0.308       | -277.779 |
| $H_2O^*$                        | -289.526       | 0.422       | -289.104 |
| <b><math>Cu_3P</math> (300)</b> |                |             |          |
| $H^*$                           | -146.423       | 0.172       | -146.251 |
| $H_2O^*$                        | -156.617       | 0.468       | -156.149 |
| <b><math>Cu_3P@CoO</math></b>   |                |             |          |



|                   |           |       |           |
|-------------------|-----------|-------|-----------|
| H*                | -1151.475 | 0.322 | -1151.153 |
| H <sub>2</sub> O* | -1162.578 | 0.389 | -1162.189 |

---

Table S2. The Gibbs free energy in each step of HER.

|                         | G <sub>0</sub> (eV) | G <sub>1</sub> (eV) | G <sub>2</sub> (eV) | G <sub>3</sub> (eV) |
|-------------------------|---------------------|---------------------|---------------------|---------------------|
| CoO (111)               | -288.252            | -289.104            | -288.659            | -288.252            |
| Cu <sub>3</sub> P (300) | -156.826            | -156.149            | -157.131            | -156.826            |
| Cu <sub>3</sub> P@CoO   | -1161.837           | -1162.189           | -1162.033           | -1161.837           |

---

## References

1. G. Kresse and J. Furthmüller, *Physical Review B*, 1996, **54**, 11169.
2. G. Kresse and J. Furthmüller, *Computational Materials Science*, 1996, **6**, 15-50.
3. G. Kresse and J. Hafner, *Physical Review B*, 1993, **47**, 558.
4. G. Kresse and D. Joubert, *Physical Review B*, 1999, **59**, 1758.
5. J. P. Perdew, K. Burke and M. Ernzerhof, *Physical Review Letters*, 1996, **77**, 3865.
